# Supplementary material
Source: PubMed Central journal article supplement (PMC5969381)
Supplement: blood821413-suppl1.pdf [file blood821413-suppl1.pdf]

## Supplemental Materials and Methods

### *Flow cytometry*

The cells were stained with the fluorophore-conjugated monoclonal antibodies c-Kit (Biolegend, San Diego, CA, clone 2B8), CD16/32 (Biolegend, 93), CD34 (BD Biosciences, RAM34), CD49b (Biolegend, DX5), Fc $\epsilon$ RI $\alpha$  (eBioscience, San Diego, CA, MAR-1), integrin  $\beta$ 7 (BD Biosciences, FIB504), Ly6G (Biolegend, 1A8), Sca-1 (Biolegend, D7), SiglecF (BD Biosciences, E50-2440), TER-119 (Biolegend, TER-119), CD48 (eBioscience, HM48-1), CD45 (Biolegend, 30-F11), CD150 (Biolegend, TC15-12F12.2), EPCR (STEMCELL Technologies, RMEPCR1560), CD55 (Biolegend, RIKO-3), CD71 (Biolegend, RI7217), CD105 (Biolegend, MJ7/18), CD49f (Biolegend, GoH3), CD41 (Biolegend and BD Biosciences, MWReg30), and CD11b (Biolegend, M1/70). Fc-block (eBioscience, clone 93) was used where appropriate to prevent non-specific binding. The EasySep Mouse Hematopoietic Progenitor Cell Isolation Kit (STEMCELL Technologies) and fluorophore-conjugated streptavidin (Biolegend) was used to stain lineage-positive cells. Dead cells were excluded using the LIVE/DEAD Fixable Aqua Dead Cell Stain Kit (Thermo Fisher Scientific), DAPI, or 7-aminoactinomycin D (Thermo Fisher Scientific). Doublets were removed from the analysis using the trigger pulse width parameters. The LSRFortessa (BD Biosciences) was used to analyze the cells. The flow cytometry data was analyzed using FlowJo software (Treestar, Ashland, OR), and further processed using RStudio and Prism (GraphPad Software, La Jolla, CA).

### *HSPC CFU-C assays*

100 LK cells were sorted and cultured in a semi-solid medium containing factors to support growth of all myelo-erythroid colony types (M3434, STEMCELL Technologies).

### *Processing of scRNA-Seq for basophil/mast cell progenitors (BMCPs) and granulocyte/monocyte progenitors (GMPs)*

scRNA-Seq was performed using Smart-Seq2 protocol as described previously.<sup>1,2</sup> Two plates of BMCPs and one plate of GMPs, with 47 single cells on each plate, were processed. Sequencing libraries were prepared using the Nextera XT DNA preparation kit (Illumina, San Diego, CA). Pooled libraries were sequenced using the HiSeq 4000 (Illumina). Samples were pooled with additional experiments for sequencing, and a customized genome index was built with GMAP/GSNAP<sup>3</sup> to discard reads caused by index-hopping in the Hoxb8 and Runx1 genes. Reads were aligned using G-SNAP and were aligned to Ensembl genes (release 81)<sup>4</sup> by HTSeq.<sup>5</sup> Analysis of BMCP and GMP scRNA-Seq data was performed using R (<https://www.r-project.org>). Cells with < 10% of total reads mapping to genes, < 200 000 reads mapping to nuclear genes or > 20% mapped reads mapping to mitochondrial genes were filtered out, leaving 89 BMCPs and 43 GMPs. Single-cell profiles were normalized using scran<sup>6</sup> and 4267 highly variable genes were identified using the ERCC spike-ins as previously described.<sup>7</sup> Counts were transformed to log<sub>10</sub>(counts+1) for dimensionality reduction and clustering. Diffusion map visualization was performed using the DiffusionMap function from the destiny R package<sup>8</sup> with 'rankcor' distance and k=10. Principal component analysis (PCA) was performed using the pcomp function.

### *Clustering and differential expression for BMCP and GMP scRNA-Seq profiles*

For clustering, highly variable genes were filtered to keep only protein coding genes and genes with mean log-transformed count > 2. Hierarchical clustering was performed on Spearman correlation with average linkage using the `hclust` function. Investigation of potential batch effects showed that the two BMCP plates contributed equally to the clusters (15 and 14 cells from each plate in cluster 1, and 29 and 31 cells from each plate in cluster 2). All protein coding genes with mean count > 1 expressed in at least 2 cells were tested for differential expression using a Wilcoxon rank sum test with Benjamini-Hochberg correction for multiple testing, with comparisons calculated between cells in cluster 1 versus cluster 2, combined clusters 1 and 3 versus 2 and combined clusters 1 and 2 versus 3. Genes were filtered to those with log<sub>2</sub> fold-change > 1 between clusters and ranked by adjusted *P* value to identify the top genes specific to clusters for visualization in the heatmaps.

### *Alignment and quality control for droplet-based scRNA-Seq*

Sample demultiplexing, barcodes processing, and gene counting was performed using the `count` commands from the Cell Ranger v1.3 pipeline (<https://support.10xgenomics.com/single-cell-gene-expression/software/overview/welcome>). After Cell Ranger processing 46 447 unique barcodes were retained for wild type (WT) data, and 14 675 for W<sup>41</sup>/W<sup>41</sup> data. Each sample was filtered for potential doublets by simulating synthetic doublets from pairs of scRNA-Seq profiles and assigning scores based on a k-nearest-neighbor classifier on PCA transformed data. The 1% and 4.5% of cells with the highest doublet scores from each Lin<sup>-</sup> Sca-1<sup>+</sup> c-Kit<sup>+</sup> (LSK) or Lin<sup>-</sup> c-Kit<sup>+</sup> (LK) sample were removed from further analysis, respectively. This excluded 1452 WT cells and 845 W<sup>41</sup>/W<sup>41</sup> cells. Cells with > 10% of unique molecular identifier (UMI) counts mapping to mitochondrial genes, expressing fewer than 500 genes, or with the total number of UMI counts further than 3 standard deviations from the mean were excluded. After quality control 44 802 WT cells and 13 815 W<sup>41</sup> cells were retained.

### *Variable gene selection for droplet-based scRNA-Seq*

5032 and 5033 variable genes were identified for the WT and W<sup>41</sup>/W<sup>41</sup> data sets, respectively, following the method of Macosko et al<sup>9</sup> with expression=0.001 and dispersion=0.05 minimum cutoffs. Cells were normalized to the same total count for each cell, and log-transformed ( $x \rightarrow \log(x+1)$ ). Each gene was scaled so it was zero-centered. Initial visualizations using diffusion maps<sup>10</sup> revealed a prominent “gap” in the erythroid cells (Figure S1C). Differentially expressed genes between these cells were enriched in cell cycle genes (Figure S1D). To correct this effect we removed any of these differentially expressed genes in the WT data that intersected with a list of cell cycle genes downloaded from Reactome (<http://www.reactome.org/>) (Figure S1E), along with any other genes that had high correlation (Pearson correlation coefficient > 0.2) with any of the genes in this intersection (Figure S1F). This resulted in 4664 genes carried forward for visualization and clustering analysis on the WT data, and 4745 genes for visualization on the W<sup>41</sup>/W<sup>41</sup> data.

### *Force-directed graph visualization*

For visualization, a k=7 nearest neighbor graph was calculated on the first 50 principal components of PCA on the variable genes. The edge list was exported into Gephi 0.9.1 (<https://gephi.org/>) and graph coordinates calculated using the ForceAtlas 2 layout.

*Visualization of gene expression sets in droplet scRNA-Seq landscape*

For a set of genes, a geometric mean based score was calculated on normalized UMI counts, and this score then plotted on the force directed graph embedding. For each cell, this score was given by  $\exp[\sum_{g \in G} \log(x_g + 1)/m]$  for  $m$  genes in a set  $G$ . To visualize HSC gene expression (Figure S1A) this score was calculated on 29 genes previously identified as being enriched in functional HSCs (MoIO genes from table S3, Wilson et al., 2015)<sup>11</sup>. To visualize BMCP cluster specific gene expression in the 44802 WT cells, values for genes listed in Figure 3D were extracted from the droplet scRNA-Seq, and the above score calculated for each cluster gene set. To calculate G2M marker gene scores, we used the set of 200 Hallmark G2M checkpoint genes downloaded from the Molecular Signatures Database.<sup>12</sup>

*Differential expression analysis on droplet-based scRNA-Seq data*

Differential expression analysis was performed between WT and W<sup>41</sup>/W<sup>41</sup> clusters using edgeR applied to UMI counts.<sup>13</sup>  $P$  values were corrected for multiple testing (Benjamini & Hochberg correction). Genes were labelled as up/down regulated based on positive/negative fold-change and ranked by adjusted  $P$  value. The top 200 up- and downregulated genes between each cluster were recorded (Supplemental Table S1).

To calculate the significance of overlap between the differentially expressed genes and biologically annotated gene sets we input the top 200 up-/downregulated genes for each cluster into the Molecular Signatures Database online tool (<http://software.broadinstitute.org/gsea/msigdb/index.jsp>) and computed overlaps between these and the Hallmark gene sets.<sup>12,14</sup>

### Supplemental Figure Legends

#### **Figure S1. After cell cycle correction, droplet-based scRNA-Seq of 44 802 hematopoietic stem and progenitor cells reveals entry points to blood lineages.**

(A) Expression of HSC genes in the droplet-based scRNA-Seq data. A geometric mean score of gene counts was calculated for each cell across genes in the HSC set. The color of cells indicates the value of this sum, with grey being the lowest value and red the highest value. (B) Expression of marker genes plotted on the force-directed graph embedding. Gene expression is plotted on a  $\log(\text{normalized count} + 1)$  scale with grey equal to no counts and dark red the maximum value detected. (C) Diffusion map components (DCs) for droplet scRNA-Seq colored by erythroid gene *Klf1* (left panel) or highlighted by cell in two groups on either side of 'gap' (right panel). Gene expression plotted on  $\log(\text{counts}+1)$  scale. (D) Enriched terms for top 100 differentially expressed genes between groups 1 and 2 from Enrichr (Reactome 2016 category).<sup>15</sup> (E) Intersection between top 100 differentially expressed genes and list of cell cycle genes downloaded from Reactome. (F) Distribution of maximum Pearson correlations between each highly variable gene and 23 differentially expressed genes in intersection in panel E. Genes with correlation  $> 0.2$  (red line) were filtered from analysis for visualization and clustering

#### **Figure S2. Alternative dimensionality reduction techniques can identify rare progenitor populations.**

(A) t-Distributed Stochastic Neighbor Embedding (t-SNE) of 44 802 droplet-based scRNA-Seq profiles colored by blood stem and progenitor marker genes. (B) Marker genes highlighted on diffusion map embedding of the same cells. Gene expression is plotted on a  $\log(\text{normalized count} + 1)$  scale with grey equal to no counts and dark red the maximum value detected.

#### **Figure S3. Separate force-directed graph embeddings reveal greater heterogeneity in LK cells compared to LSK cells.**

(A) Expression of marker genes plotted on the force-directed graph embedding calculated on LSK cells alone. (B) Expression of marker genes plotted on the force-directed graph embedding calculated on LK cells alone. Gene expression is plotted on a  $\log(\text{normalized count} + 1)$  scale with grey equal to no counts and dark red the maximum value detected. (C) Principal Component Analysis (PCA) was performed on LSK and LK cells together, and then pairwise distances within the LSK or LK cell populations were calculated. The histograms show the distributions of the median distance to other cells for each cell within either LSK or LK populations.

#### **Figure S4. $\text{Lin}^- \text{Sca-1}^- \text{c-Kit}^+ \text{integrin } \beta 7^{\text{hi}} \text{CD16/32}^{\text{hi}}$ bone marrow progenitors form mast cells and basophils.**

(A) Flow cytometry analysis of BMCPs (red) and MPs (black). (B) BMCPs, MPs, and GMPs were cultured for 5 days with IL-3, IL-5, IL-9, GM-CSF, and SCF and analyzed by flow cytometry. The top row shows an example in which BMCPs, MPs, and GMPs were cultured separately, but pooled before analysis, to visualize all cell populations simultaneously. (C) BMCPs and MPs were cultured in myeloid-promoting conditions. Mast cells, basophils, neutrophils, and eosinophils were sorted as described in panel B and stained with May-Grünwald Giemsa. Photo width, 60  $\mu\text{m}$ . (D) May-Grünwald Giemsa-stained monocyte derived from an MP. The mast cells and basophils were sorted from the BMCP population, and the eosinophils and neutrophils were sorted from the MP population. No live/dead staining was used for the cell sort on day 5. Photo width, 60  $\mu\text{m}$ . (E) Single BMCPs were cultured in myeloid-promoting conditions in individual Terasaki plate wells and

the colonies were analyzed with flow cytometry on day 5. Examples of a pure mast cell colony, basophil colony, and a mixed mast cell/basophil colony are shown. (F-H) Single bone marrow progenitors from wild type mice were sorted and cultured under myeloid-promoting conditions. The colony size was determined by visually counting the number of cells in each well at the indicated time point. A colony was defined as at least 5 cells arising from a single progenitor. The whiskers indicate the minimum and maximum values. Each dot represents one colony. The results are pooled from 2 independent sorts for each time point. The two-tailed Mann-Whitney test was used when two groups were compared, and the Kruskal-Wallis test with Dunn's multiple comparisons test was used when three groups were compared. Day 11 GMPs were not analyzed as they mainly constituted dead cells. \*\**P* value <.01, \*\*\*\**P* value<.0001. Ba, basophil; Eo, eosinophil; MC, mast cell; Mono, monocyte; and N, neutrophil. Images were captured using the Axio Imager.Z2, AxioCam 506, and Zen software (Zeiss, Oberkochen, Germany).

**Figure S5.  $\text{Lin}^- \text{Sca-1}^- \text{c-Kit}^+$  integrin  $\beta 7^{\text{hi}}$   $\text{CD16/32}^{\text{hi}}$  bone marrow progenitors lack erythroid potential.** (A) Gating strategy of bone marrow BMCPs and MEPs.  $\text{Lin}^- \text{Sca-1}^- \text{c-Kit}^+$  progenitors are visualized in the plots. (B) BMCPs and MEPs were cultured with IL-3, SCF, and EPO, and analyzed by flow cytometry. The gating strategy of basophils, mast cells, and erythroid cells are shown. Ba indicates basophil; Ery, erythroid cell; and MC, mast cell. (C-D) Single bone marrow progenitors from wild type mice were sorted and cultured under erythroid-promoting conditions. The colony size was determined by visually counting the number of cells in each well at the indicated time point. A colony was defined as at least 5 cells arising from a single progenitor. The whiskers indicate the minimum and maximum values. Each dot represents one colony. The results are pooled from 2 independent sorts for each time point. Two-tailed Mann-Whitney test; \*\*\*\**P* value<.0001. Day 5 MEPs were not analyzed as they mainly constituted dead cells. (E) Representative flow cytometry analysis before the first and second sorts.

**Figure S6. Basophil/mast cell progenitors (BMCPs) and granulocyte monocyte progenitors (GMPs) show distinct gene expression profiles.** (A) Heatmap of the expression of top 100 most upregulated genes in BMCPs versus GMPs. (B) Heatmap of the expression of top 100 most upregulated genes in GMPs versus BMCPs.

**Figure S7. Cluster 1 BMCPs display a more differentiated phenotype than cluster 2 BMCPs.** Cluster 1 and 2 BMCPs plotted based on the flow cytometry index data. The parameters that are significant (*P* value<.05) based on the two-tailed Mann-Whitney test are shown. The box shows the interquartile range (IQR) and the median is marked with a horizontal line. The whiskers indicate (25% quartile – 1.5 x IQR, 75% quartile + 1.5 x IQR). All cells with index data are shown. SSC indicates side scatter. \*\*\**P* value<.0005, \*\**P* value<.005, \**P* value<.05

**Figure S8. Cells from c-Kit mutant mice can be mapped to clusters in wild-type compartment.** (A) Violin plots of marker gene expression in clusters in wild-type (WT)  $\text{Lin}^- \text{c-Kit}^+$  (LK) cells. (B) Violin plots of marker gene expression in LK cells from  $\text{W}^{41}/\text{W}^{41}$  c-Kit mutant mice mapped to WT clusters. Colors match those in Figure 4 for the same clusters. (C) Bone marrow progenitors from  $\text{W}^{41}/\text{W}^{41}$  mice were sorted and cultured under myeloid-promoting conditions. The colony size was determined by visually counting the number of cells in each well on day 5. A colony

was defined as at least 5 cells arising from a single progenitor. The whiskers indicate the minimum and maximum values. Each dot represents one colony. The results are pooled from 2 independent sorts for each time point. Two-tailed Mann-Whitney test; \*\*\*\* $P$  value<.0001.

**Figure S9. The frequency of late erythroid progenitors is increased in  $W^{41}/W^{41}$  mice.** (A) Gating strategy for the identification of populations P1-P5 in bone marrow. The analysis was performed without red blood cell lysis. (B)  $\text{Log}_2$ -fold change of the frequency of a cell population in the  $W^{41}/W^{41}$  mice compared with wild type mice. Left-hand and right-hand bars indicate fold-changes for samples from two separate  $W^{41}/W^{41}$  mice. The mean of samples from two separate wild type mice was used for the comparison. (Ci) CFU assays of  $\text{Lin}^- \text{c-Kit}^+$  (LK) cells.  $W^{41}/W^{41}$  and WT LK cells were sorted and cultured for 7 (blue), 10 (black), or 12 (red) days and the colony types were determined.  $W^{41}/W^{41}$  CFUs are reported as percentage of the mean number of wild type colonies of the same type within an experiment. The results are derived from 6  $W^{41}/W^{41}$  and 4 WT mice from 3 independent sorts. Whiskers display minimum and maximum values, and all 6  $W^{41}/W^{41}$  mice are shown. Two-tailed one-sample t-test different from 100 %; \* $P$  value<.05. (Cii) Single E-SLAMs were cultured for 14 days with stem cell factor and IL-11 and analyzed by flow cytometry. Data concatenated from 32 WT and 10  $W^{41}/W^{41}$  colonies is shown. Mo, monocyte; Neu, neutrophil; MK, megakaryocyte. (D) Expression of G2/M marker genes (Hallmark set) in the wild-type (WT) and  $W^{41}/W^{41}$  droplet-based scRNA-Seq data of LK cells. A geometric mean score of gene counts was calculated for each cell across genes in this set. The color of cells indicates the value of this sum, with blue being the lowest value and red the highest value. (E) Violin plots of G2M score from C in WT and  $W^{41}/W^{41}$  clusters in LK cells. Colors match those in Figure 4. (F) Correlation between pseudotime ordering of WT cells from clusters 1, 6, 3, 2 & 5 (stem cells to erythroid) calculated on variable genes (x-axis) and variable genes with Hallmark G2M genes removed (y-axis). Pseudotime ordering was calculated with diffusion pseudotime (DPT).<sup>16</sup> (G) Violin plots of erythroid genes marking different stages of differentiation in WT and  $W^{41}/W^{41}$  clusters 1, 6, 3, 2 & 5 to confirm differentiation order of these clusters. (H,I) Violin plots showing the distribution of selected genes in WT and corresponding  $W^{41}/W^{41}$  clusters, as measured by scRNA-Seq. Colors correspond to those in Figure 4.

## References

1. Wilson NK, Kent DG, Buettner F, et al. Combined Single-Cell Functional and Gene Expression Analysis Resolves Heterogeneity within Stem Cell Populations. *Cell Stem Cell*. 2015;16(6):712–724.
2. Picelli S, Faridani OR, Björklund ÅK, et al. Full-length RNA-seq from single cells using Smart-seq2. *Nat. Protoc*. 2014;9:171.
3. Wu TD, Nacu S. Fast and SNP-tolerant detection of complex variants and splicing in short reads. *Bioinformatics*. 2010;26(7):873–881.
4. Yates A, Akanni W, Amode MR, et al. Ensembl 2016. *Nucleic Acids Res*. 2016;44(D1):D710–D716.
5. Anders S, Pyl PT, Huber W. HTSeq-A Python framework to work with high-throughput sequencing data. *Bioinformatics*. 2015;31(2):166–169.
6. Lun ATL, Bach K, Marioni JC. Pooling across cells to normalize single-cell RNA sequencing data with many zero counts. *Genome Biol*. 2016;17(1):75.
7. Brennecke P, Anders S, Kim JK, et al. Accounting for technical noise in single-cell RNA-seq experiments. *Nat. Methods*. 2013;10(11):1093–1095.
8. Angerer P, Haghverdi L, Büttner M, et al. destiny: diffusion maps for large-scale single-cell data in R. *Bioinformatics*. 2016;32(8):1241–1243.
9. Macosko EZ, Basu A, Satija R, et al. Highly parallel genome-wide expression profiling of individual cells using nanoliter droplets. *Cell*. 2015;161(5):1202–1214.
10. Haghverdi L, Buettner F, Theis FJ. Diffusion maps for high-dimensional single-cell analysis of differentiation data. *Bioinformatics*. 2015;1–10.
11. Wilson NK, Kent DG, Buettner F, et al. Combined Single-Cell Functional and Gene Expression Analysis Resolves Heterogeneity within Stem Cell Populations. *Cell Stem Cell*. 2015;712–724.
12. Liberzon A, Birger C, Thorvaldsdóttir H, et al. The Molecular Signatures Database Hallmark Gene Set Collection. *Cell Syst*. 2015;1(6):417–425.
13. Robinson MD, McCarthy DJ, Smyth GK. edgeR: a Bioconductor package for differential expression analysis of digital gene expression data. *Bioinformatics*. 2010;26(1):139–140.
14. Subramanian A, Tamayo P, Mootha VK, et al. Gene set enrichment analysis: A knowledge-based approach for interpreting genome-wide expression profiles. *Proc. Natl. Acad. Sci*. 2005;102(43):15545–15550.
15. Kuleshov M V., Jones MR, Rouillard AD, et al. Enrichr: a comprehensive gene set enrichment analysis web server 2016 update. *Nucleic Acids Res*. 2016;44(W1):W90–W97.
16. Haghverdi L, Büttner M, Wolf FA, Buettner F, Theis FJ. Diffusion pseudotime robustly reconstructs lineage branching. *Nat. Methods*. 2016;13(10):845–848.

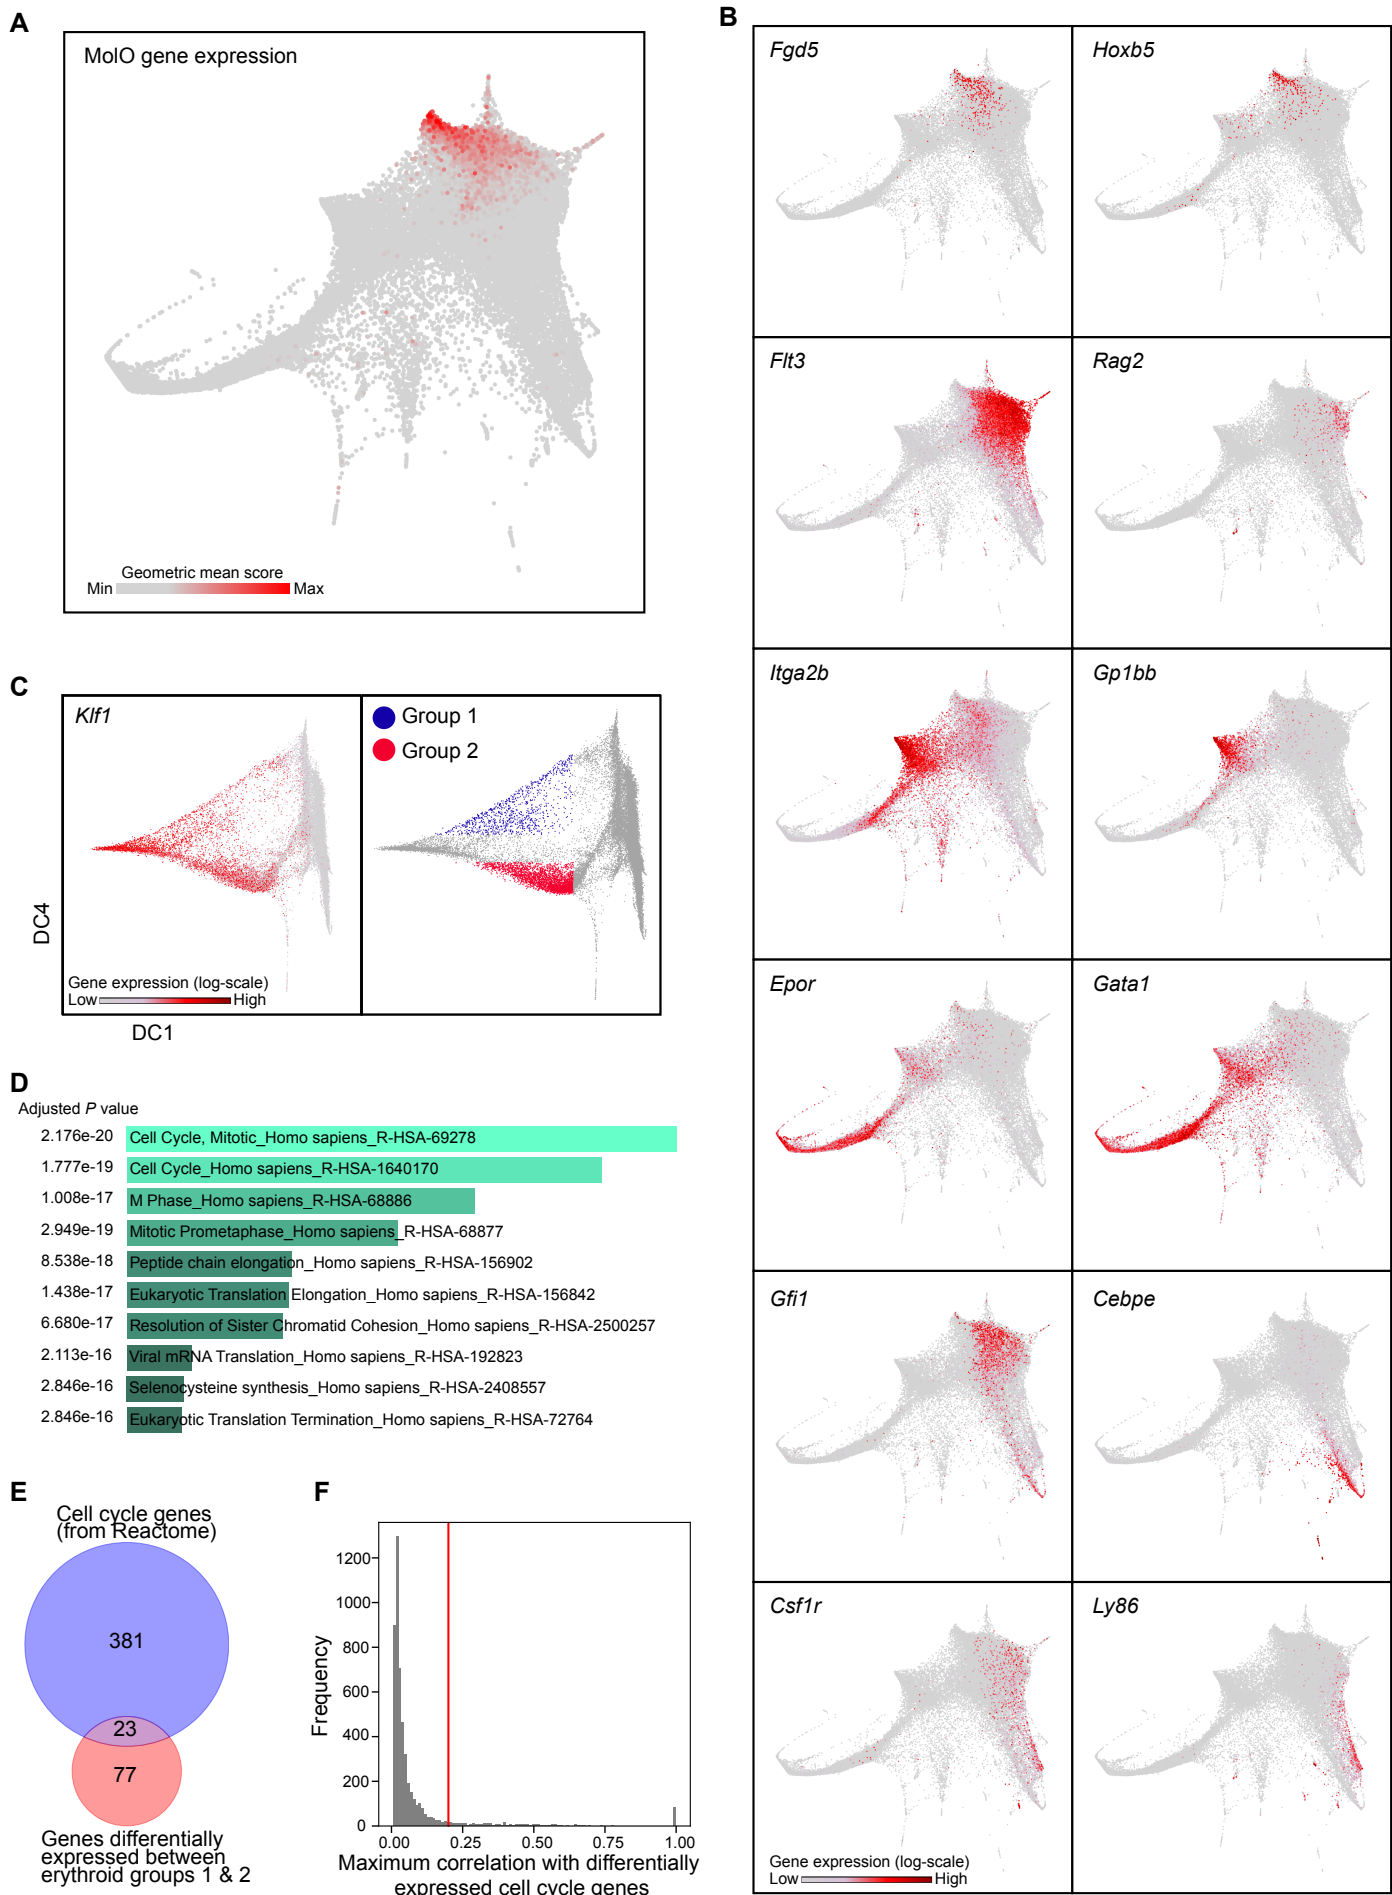

Figure S1



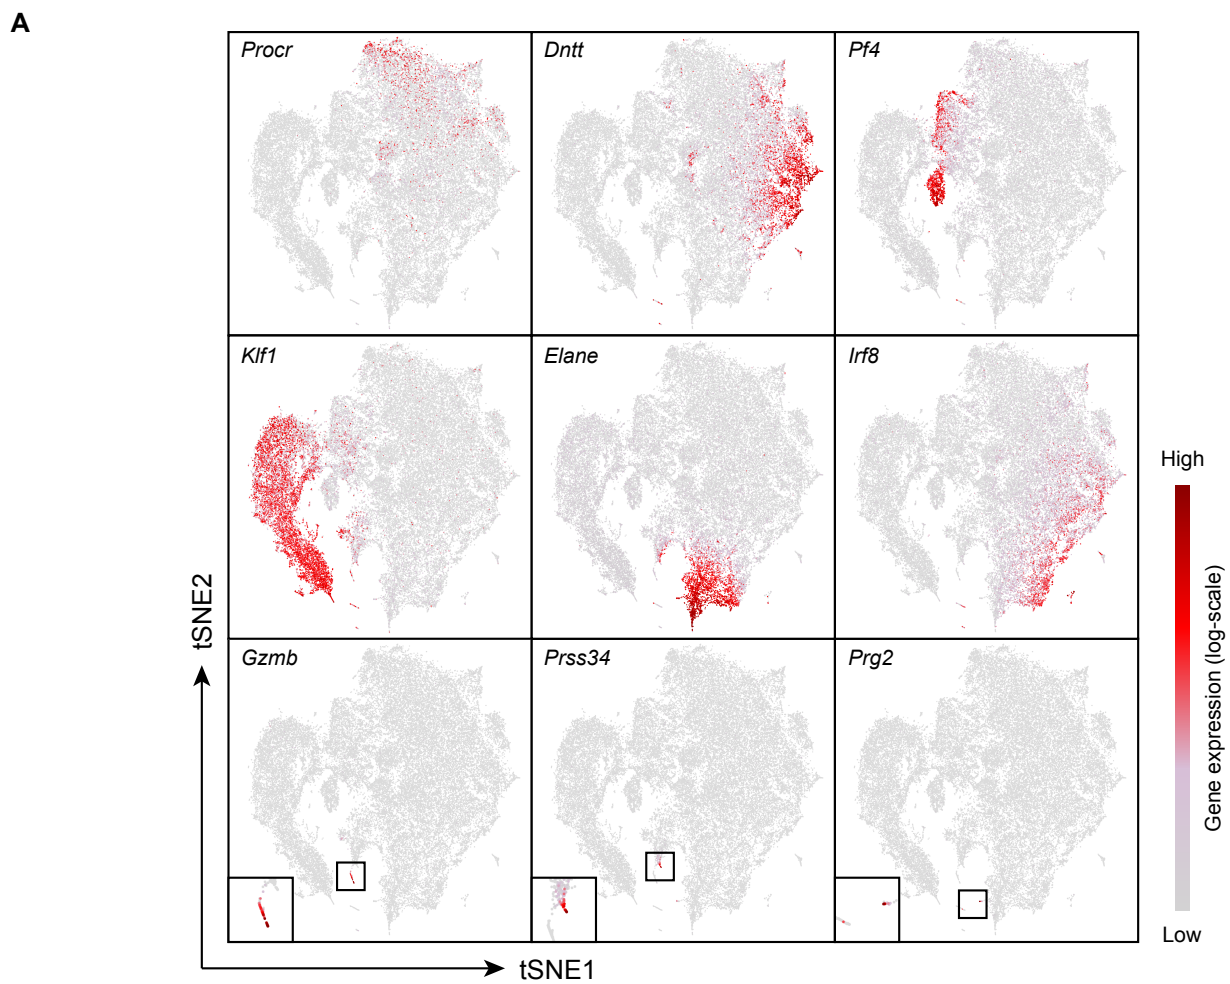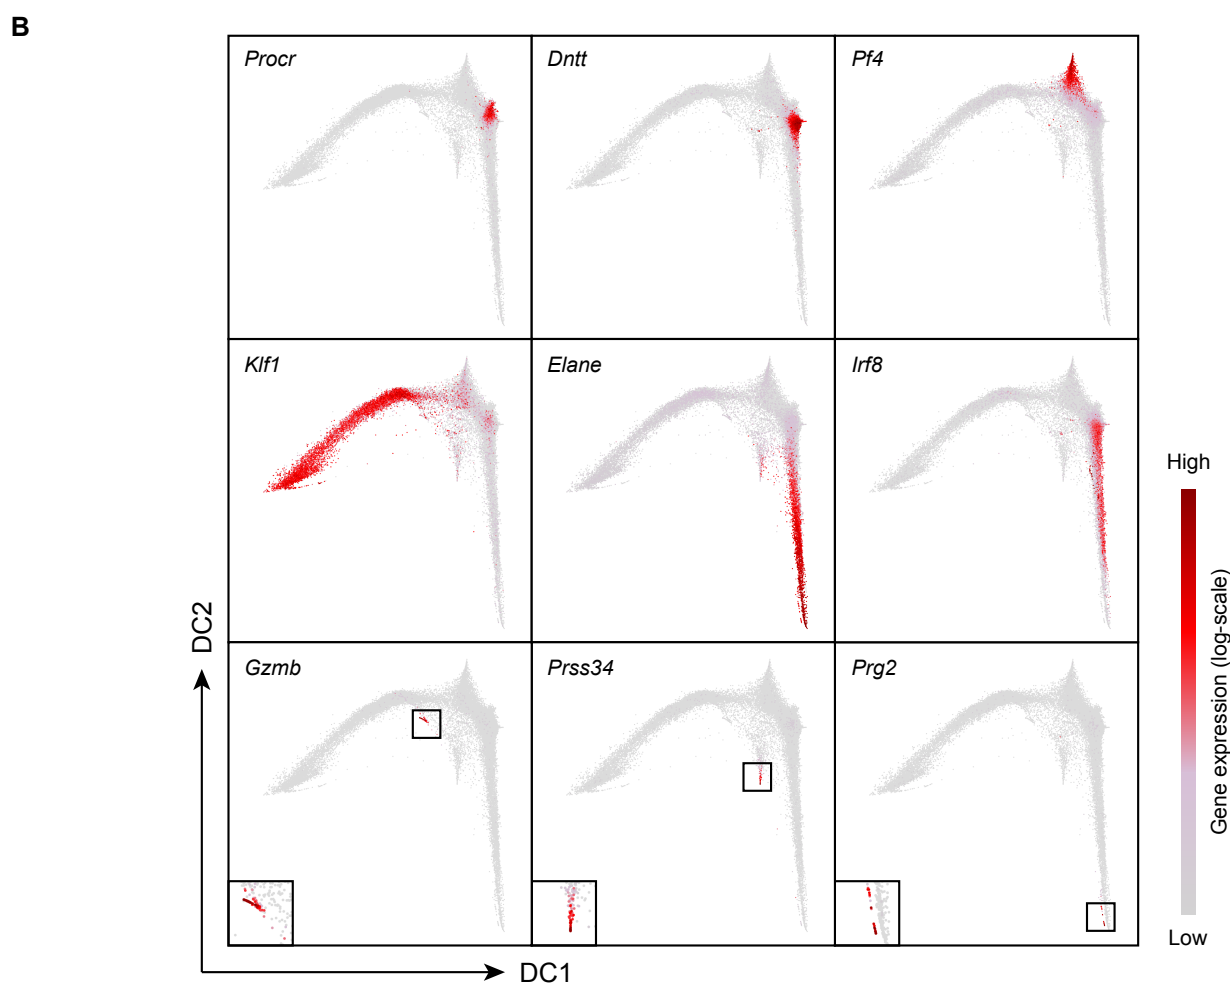

Figure S2

**A**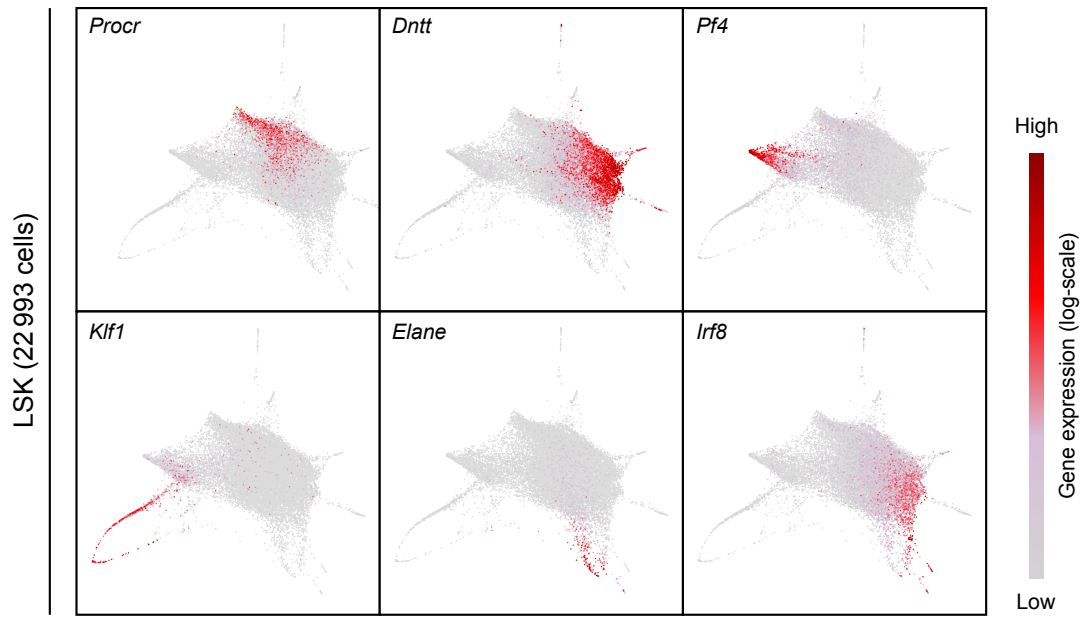**B**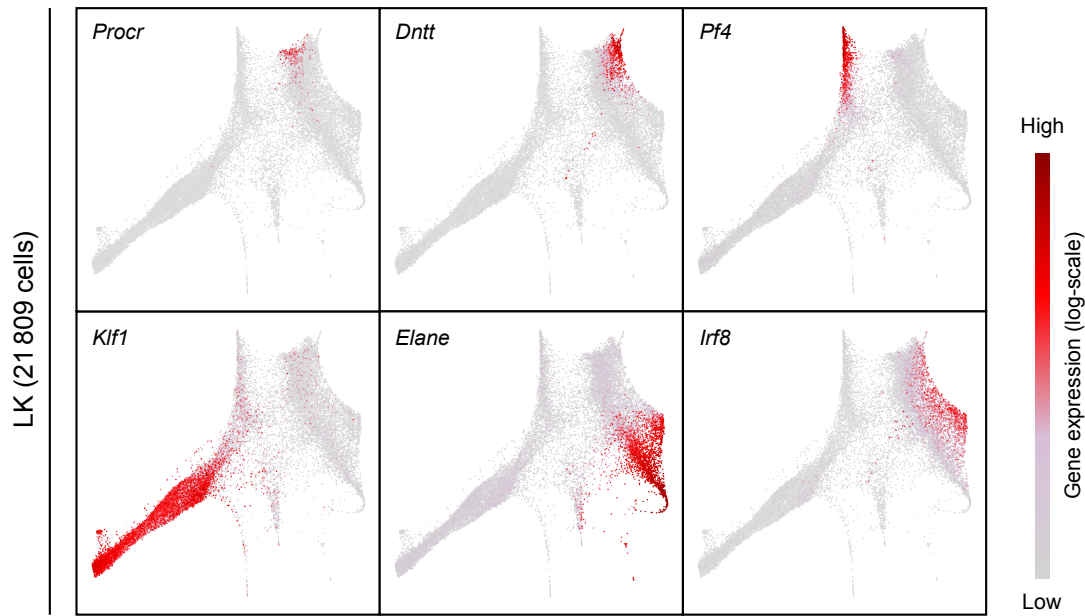**C**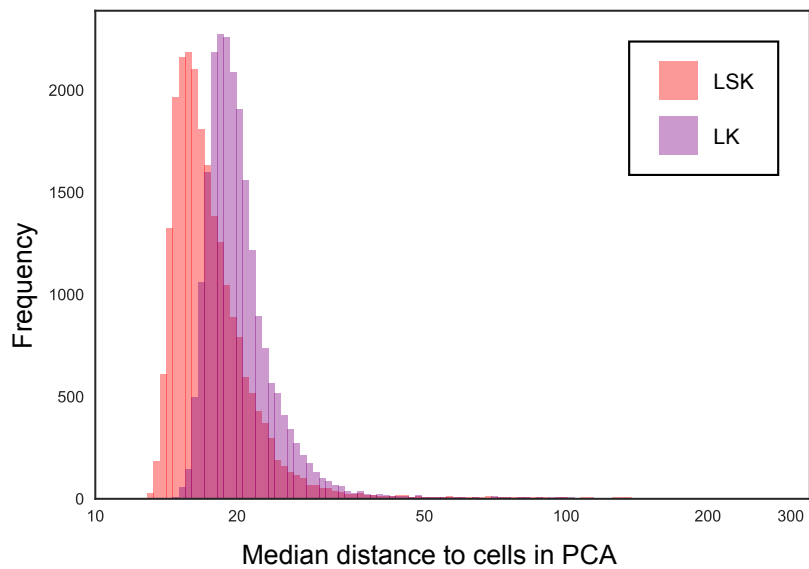**Figure S3**

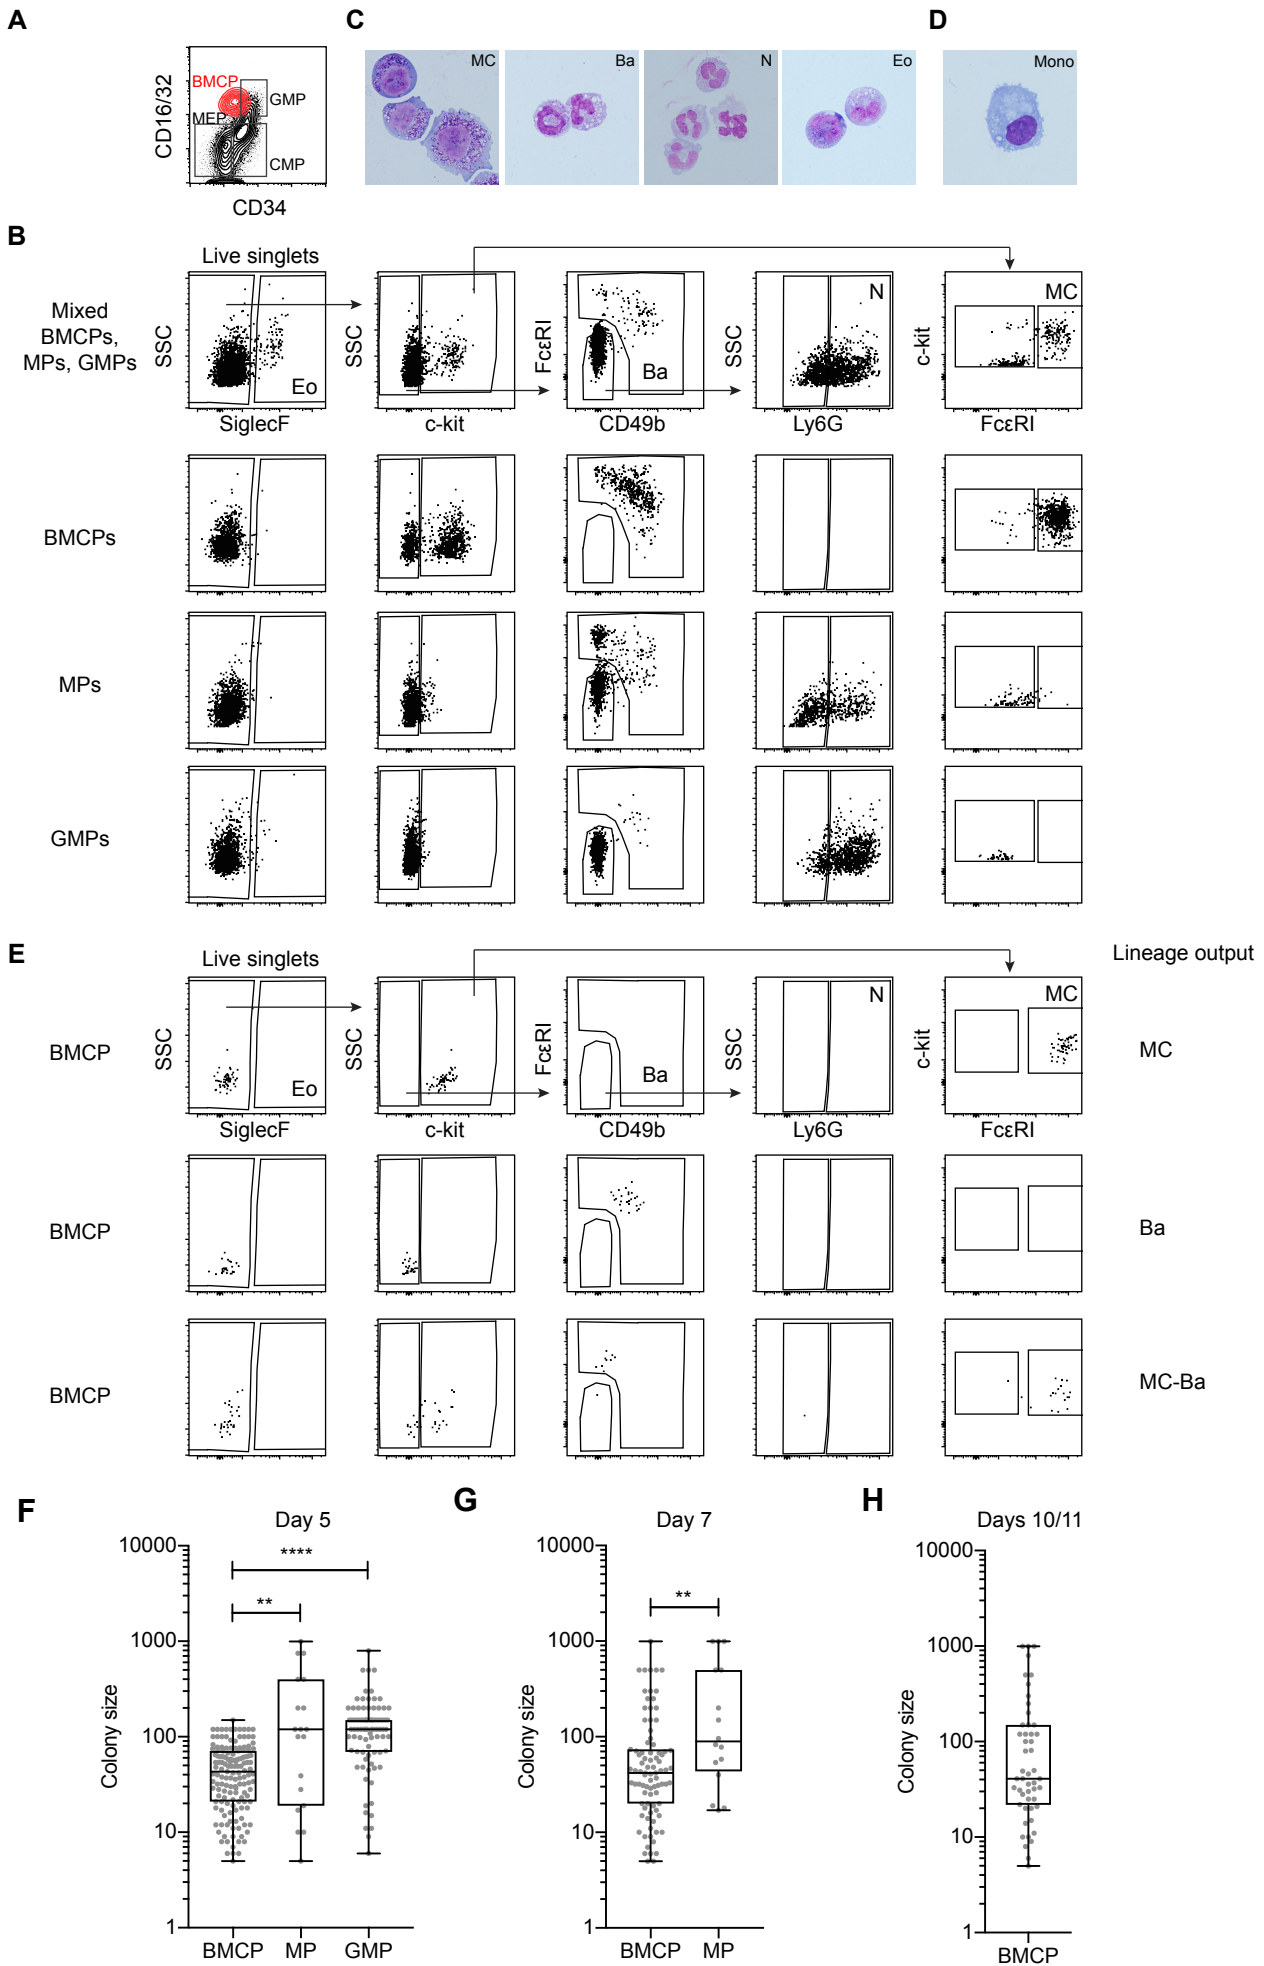

**Figure S4**

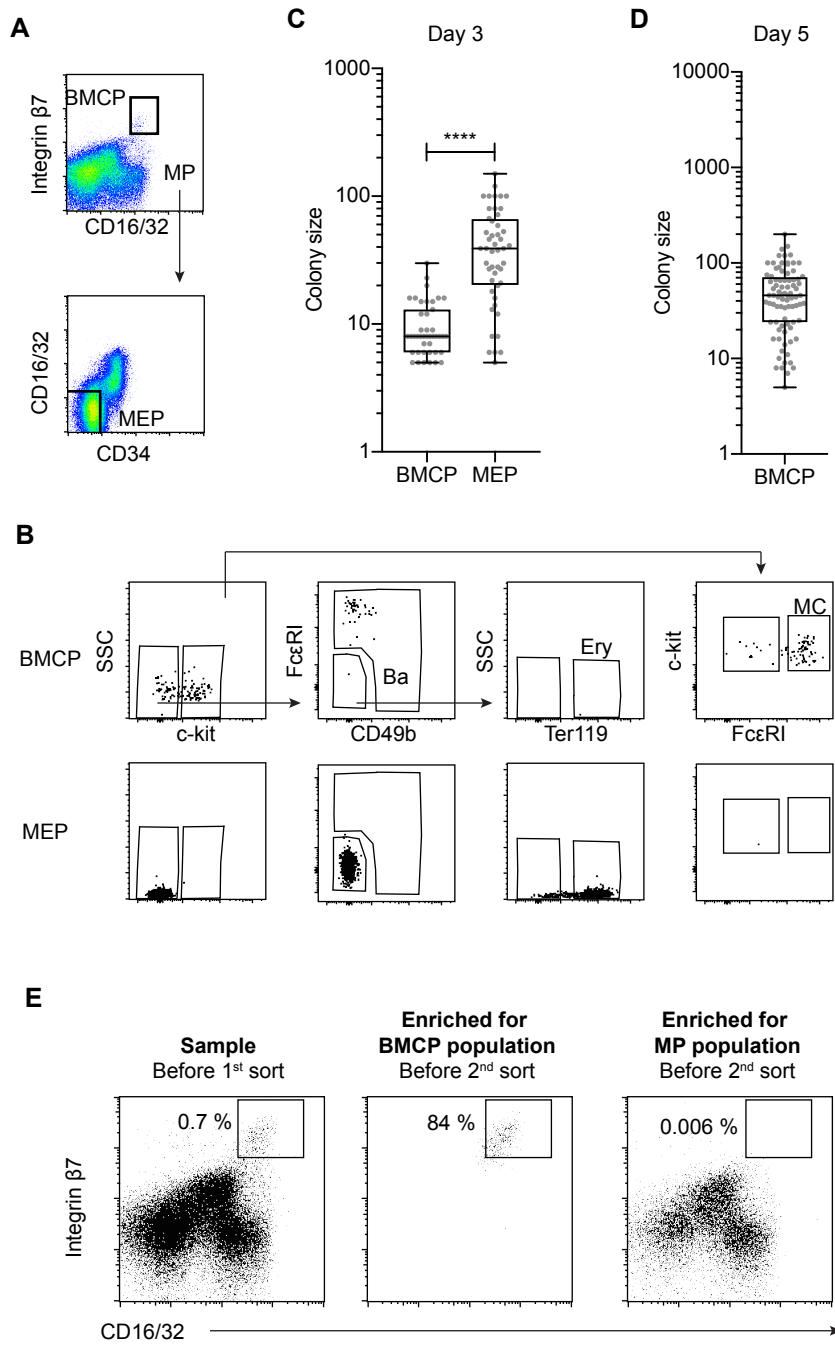

Figure S5

A

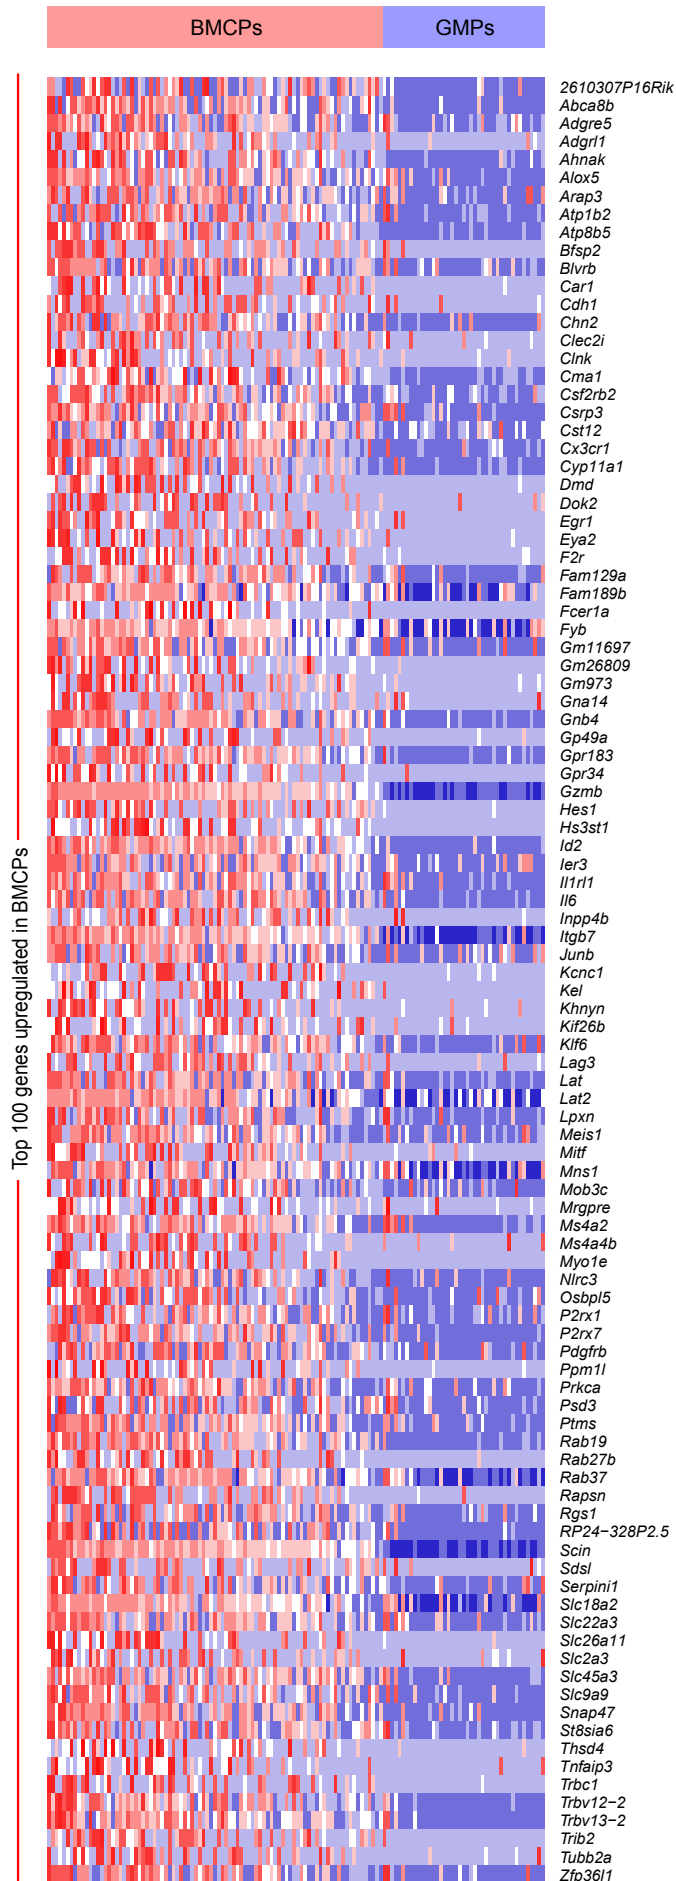

B

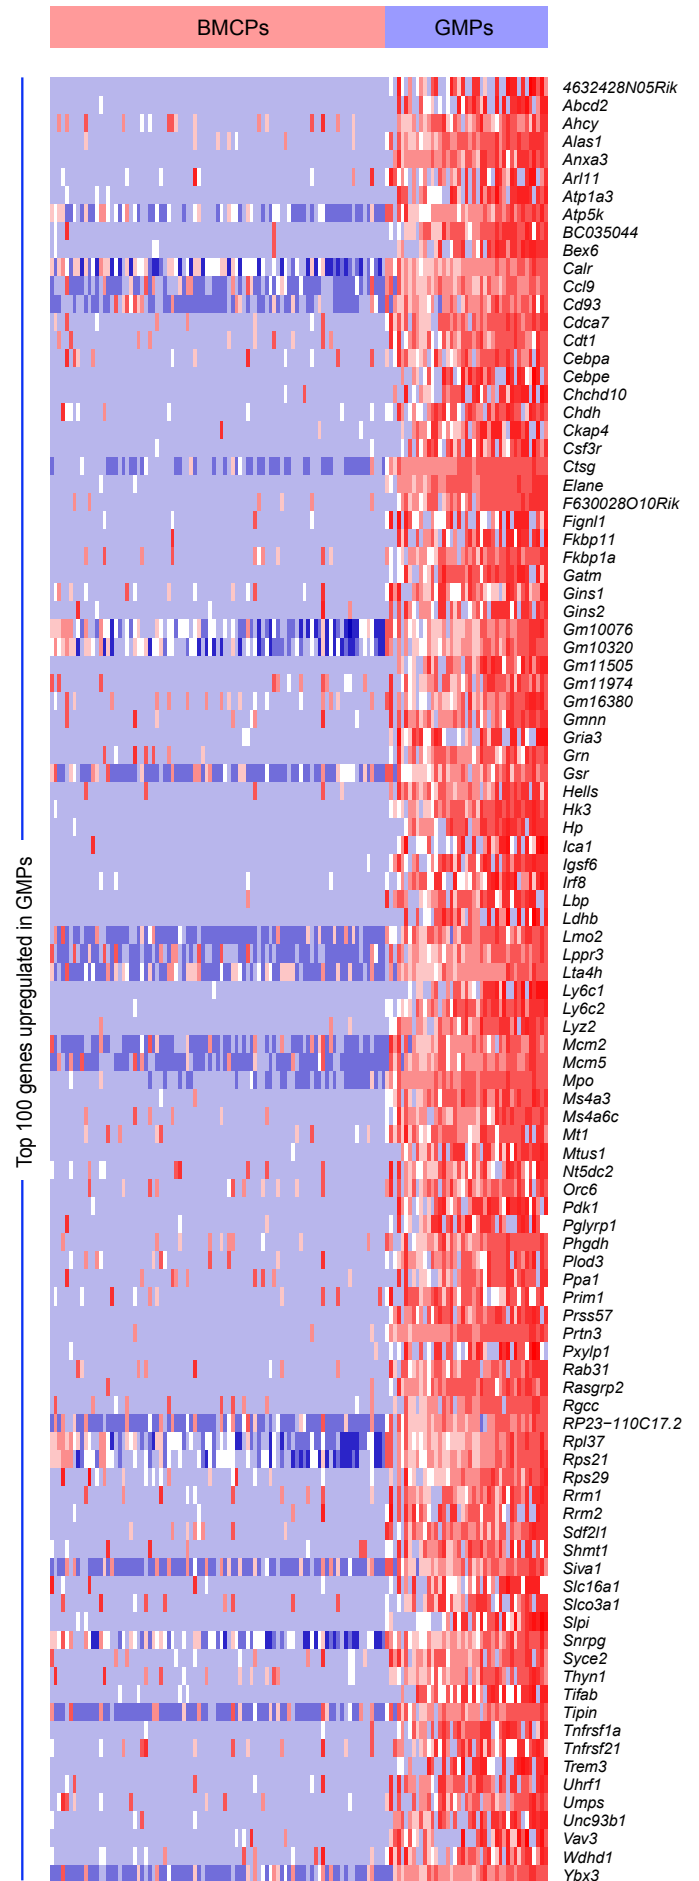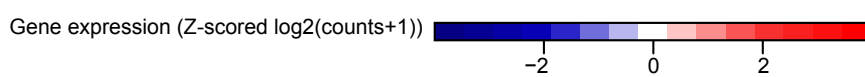

Figure S6

**A**

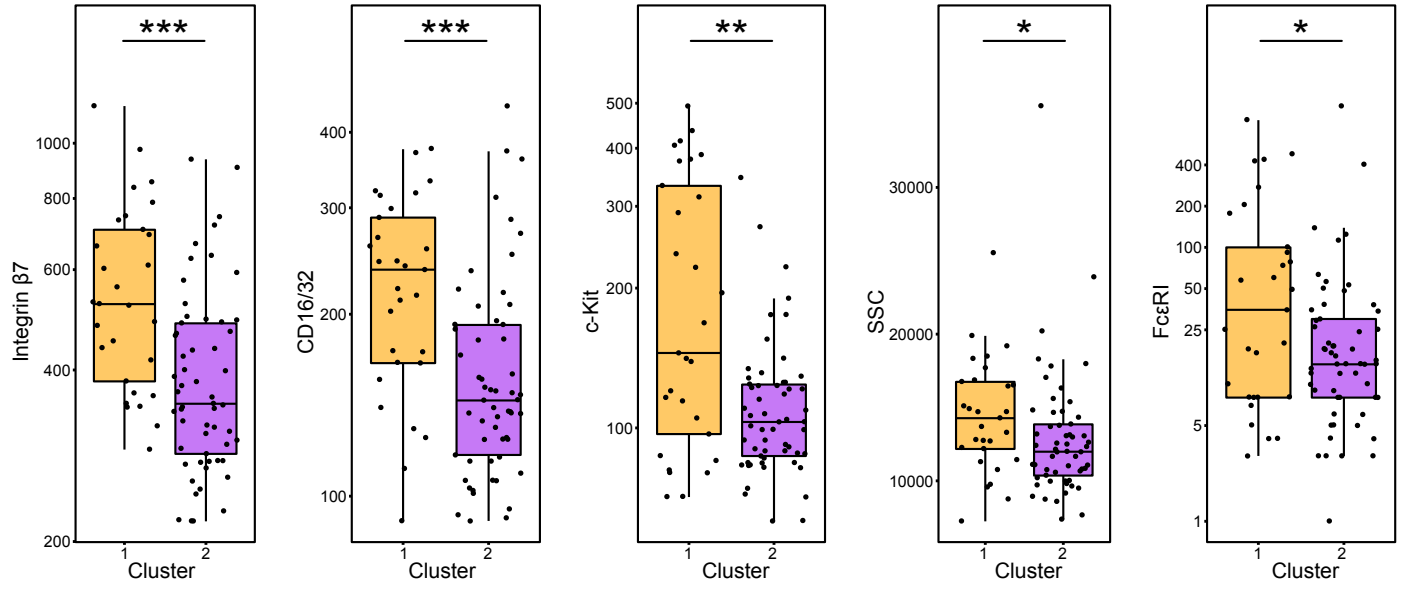

**Figure S7**

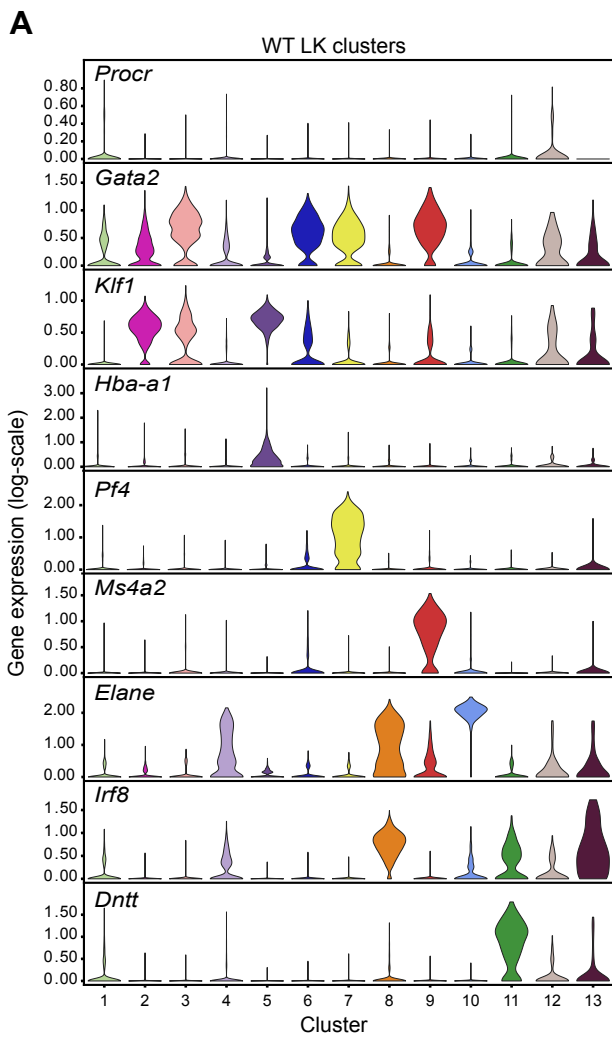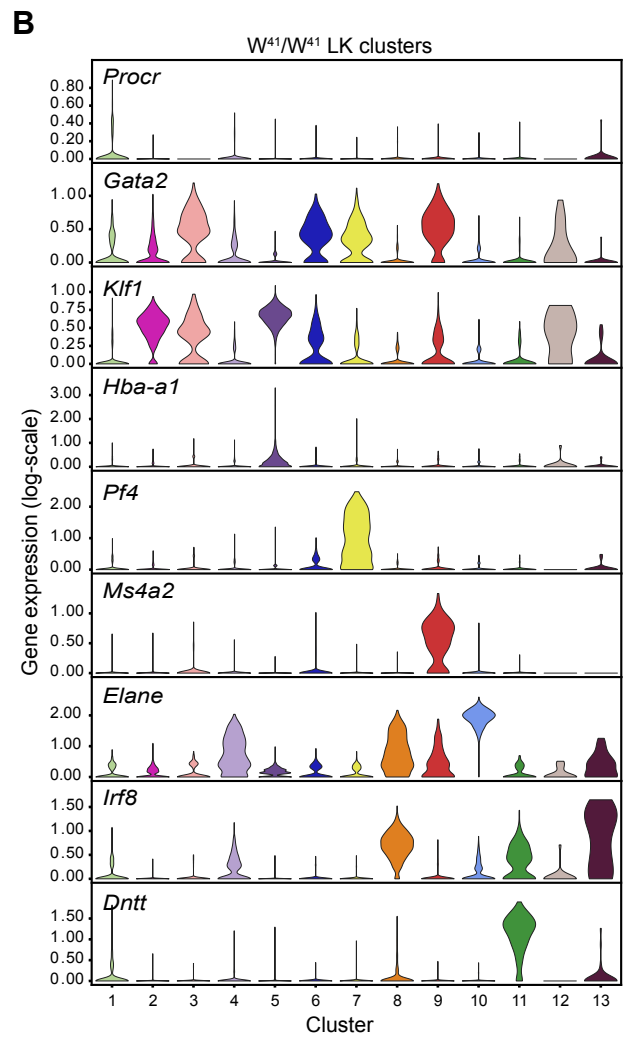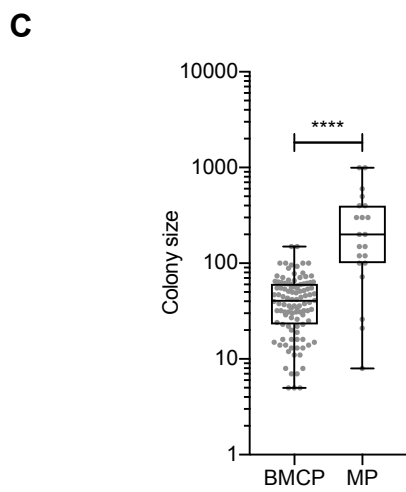

Figure S8

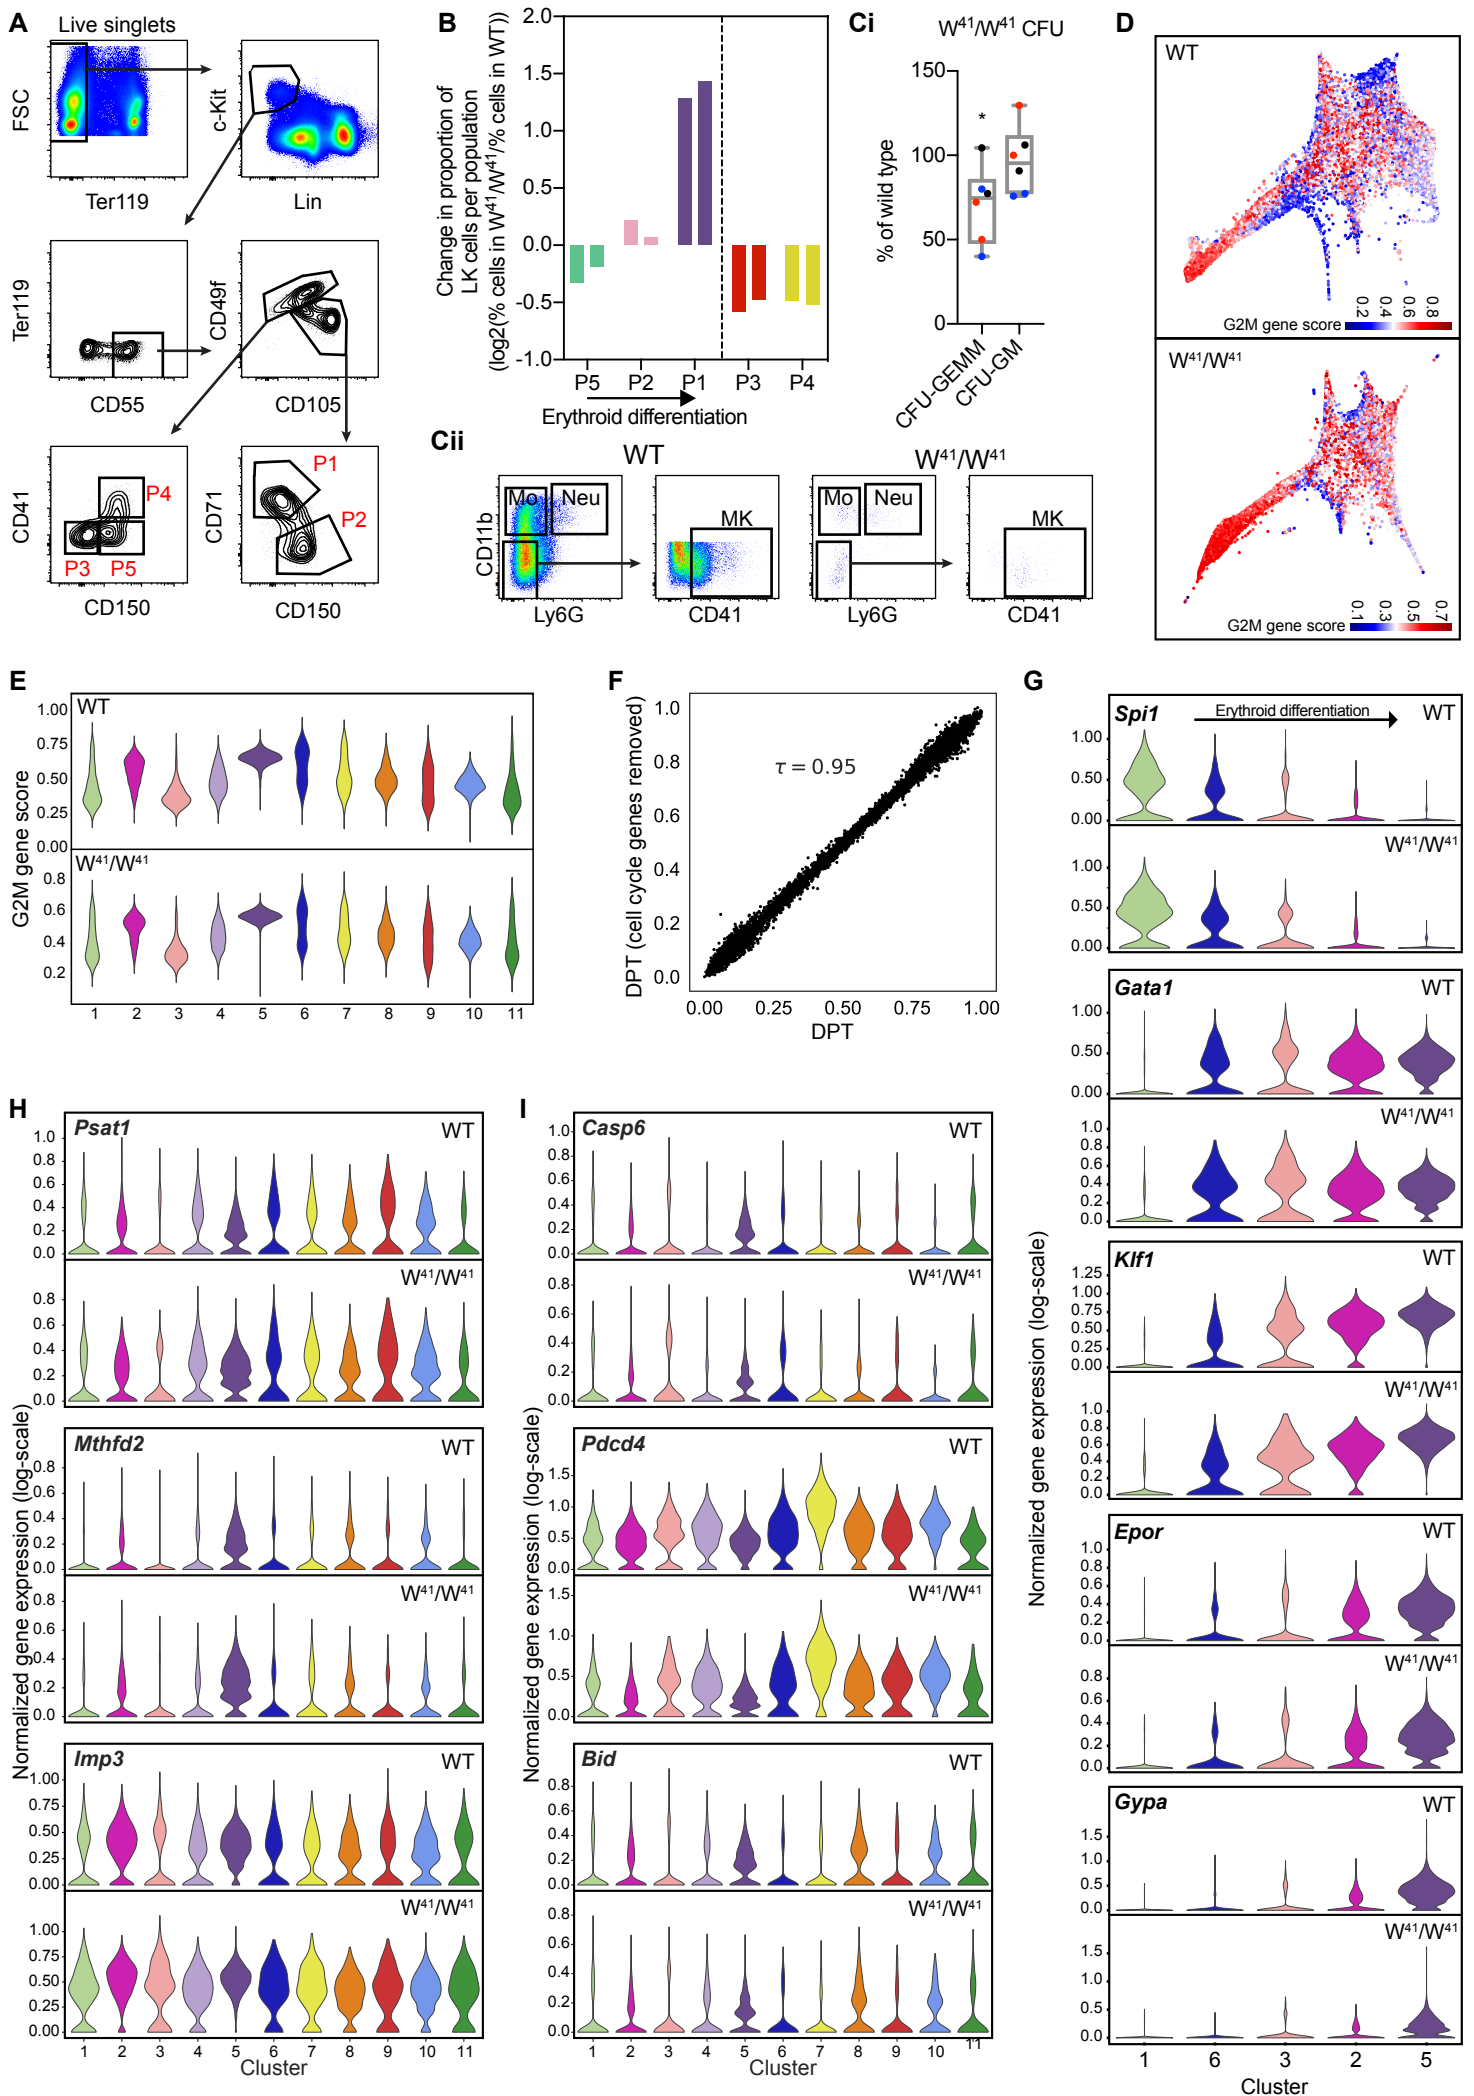

Figure S9
